# Supplementary material
Source: PubMed Central journal article supplement (PMC3931010)
Supplement: NIHMS548393-supplement-1_si_001.pdf [file NIHMS548393-supplement-1_si_001.pdf]

# Supporting Information for

## Synthesis, Characterization and Catalytic Activity of Ni(II) Alkyl Complexes Supported by Pyrrole-Diphosphine Ligands

Gopaladasu T. Venkanna, Swetha Tammineni, Hadi D. Arman, and Zachary J. Tonzetich\*

Department of Chemistry, University of Texas at San Antonio, San Antonio, TX 78249

zachary.tonzetich@utsa.edu

---

| Contents                                                                                                                                   | Pages |
|--------------------------------------------------------------------------------------------------------------------------------------------|-------|
| <b>Figure S1.</b> $^1\text{H}$ NMR spectrum of $\text{H}(\text{P}_2^{\text{Cy}}\text{Pyr})$ ( <b>2</b> ).                                  | S2    |
| <b>Figure S2.</b> Electronic absorption spectrum of <b>4</b> in $\text{CH}_2\text{Cl}_2$ .                                                 | S2    |
| <b>Figure S3.</b> CV of <b>4</b> in THF displaying the cathodic events observed at low potentials.                                         | S3    |
| <b>Figure S4.</b> Comparison of the cathodic events observed by CV for <b>3</b> and <b>4</b> in THF.                                       | S3    |
| <b>Figure S5.</b> CV of <b>4</b> in $\text{CH}_2\text{Cl}_2$ displaying the anodic events observed at higher potentials.                   | S4    |
| <b>Figure S6.</b> Thermal ellipsoid drawing of $[\text{Ni}(\text{CH}_3)(\text{P}_2^{\text{Cy}}\text{Pyr})]$ ( <b>6</b> ).                  | S4    |
| <b>Figure S7.</b> $^1\text{H}$ NMR spectrum of $[\text{Ni}(\eta^1\text{-C}_3\text{H}_5)(\text{P}_2^{\text{Cy}}\text{Pyr})]$ ( <b>14</b> ). | S5    |
| <b>Figure S8.</b> $^1\text{H}$ NMR and IR spectra of the reaction of <b>5</b> with CO.                                                     | S5    |
| <b>Figure S9.</b> $^1\text{H}$ NMR spectrum of $[\text{NiH}(\text{P}_2^{\text{Cy}}\text{Pyr})]$ ( <b>15</b> ).                             | S6    |
| <b>Figure S10.</b> $^1\text{H}$ NMR spectrum of the reaction of <b>15</b> with $\text{CO}_2$ .                                             | S6    |
| <b>Table S1.</b> Crystallographic data and refinement parameters for <b>4</b> , <b>6</b> , and <b>7</b> .                                  | S7    |
| <b>Table S2.</b> Crystallographic data and refinement parameters for <b>10</b> , <b>11</b> , and <b>14</b> .                               | S8    |

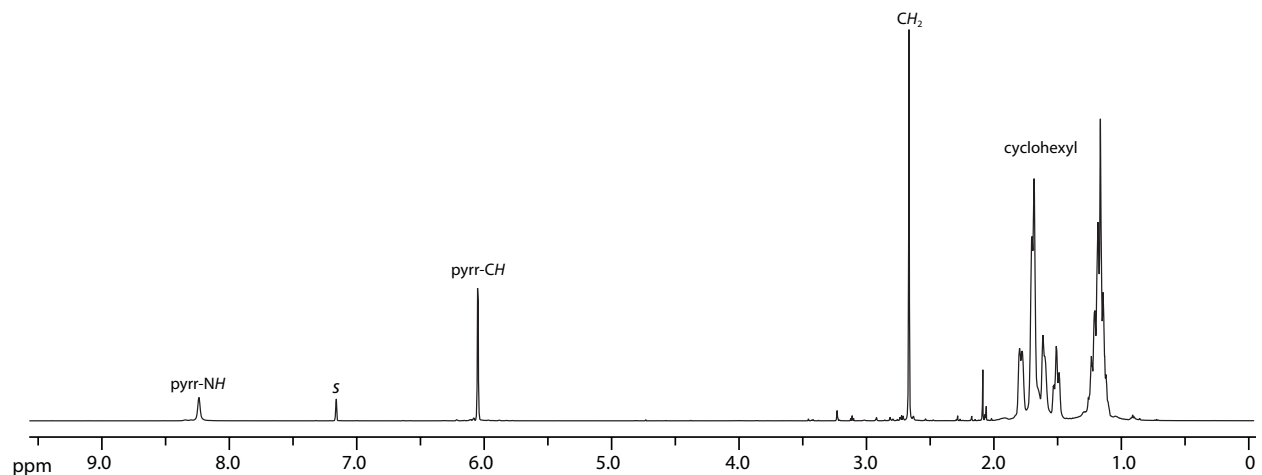

**Figure S1.** 500 MHz  $^1\text{H}$  NMR spectrum of  $\text{H}(\text{P}_2^{\text{Cy}}\text{Pyr})$  (2) in benzene- $d_6$ .

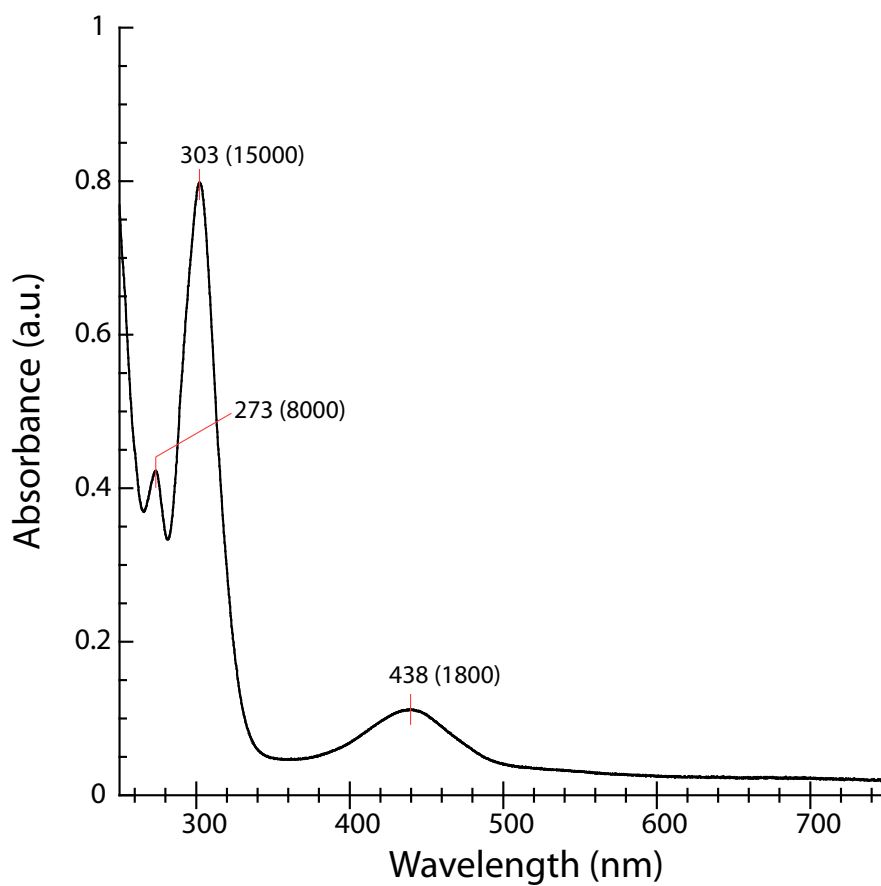

**Figure S2.** Electronic absorption spectrum of  $[\text{NiCl}(\text{P}_2^{\text{Cy}}\text{Pyr})]$  (4) in  $\text{CH}_2\text{Cl}_2$  (50  $\mu\text{M}$ ).

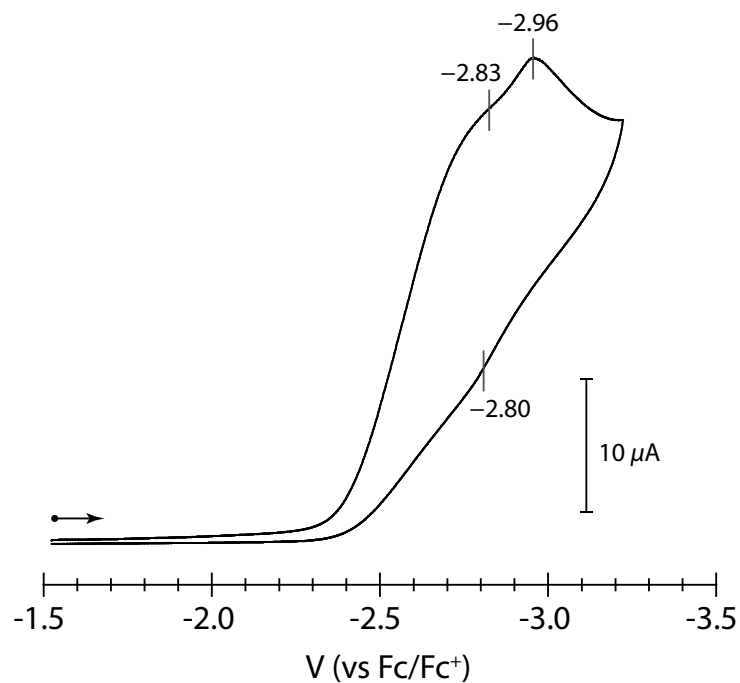

**Figure S3.** Cyclic voltammogram of 3 mM [NiCl(P<sub>2</sub><sup>Cy</sup>Pyr)] (**4**) at a glassy carbon electrode in THF displaying the cathodic events observed at low potentials. Scan rate is 50 mV/s and the supporting electrolyte is 0.1 M Bu<sub>4</sub>NPF<sub>6</sub>.

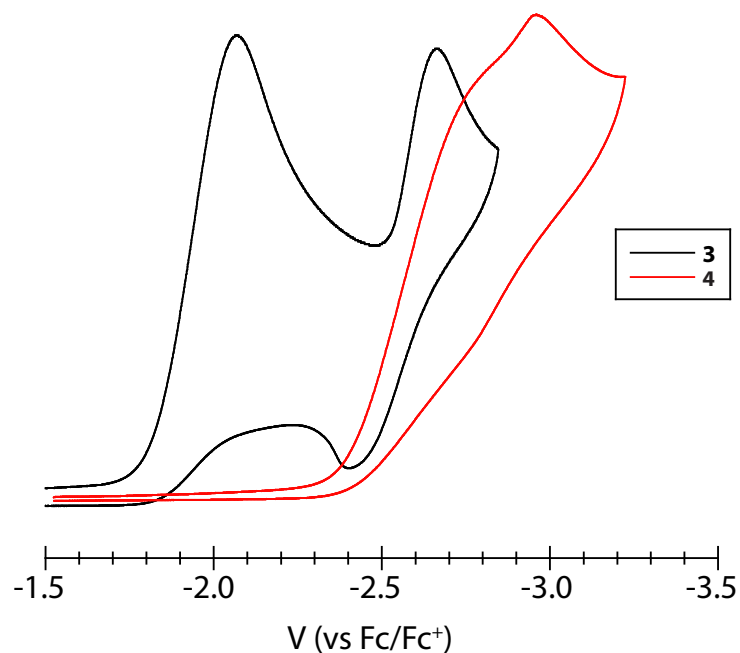

**Figure S4.** Comparison of the cathodic events observed for [NiCl(P<sub>2</sub><sup>Ph</sup>Pyr)] (**3**, black) and [NiCl(P<sub>2</sub><sup>Cy</sup>Pyr)] (**4**, red) in THF.

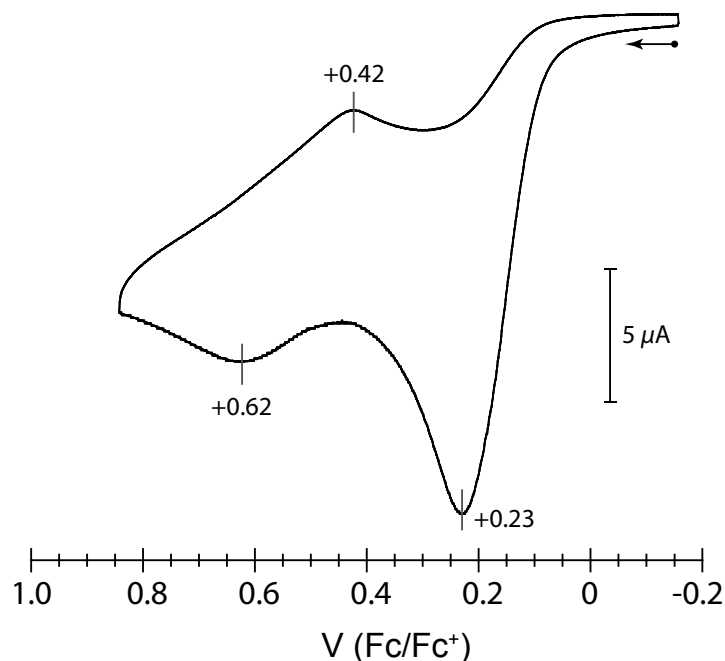

**Figure S5.** Cyclic voltammogram of 2 mM  $[\text{NiCl}(\text{P}_2^{\text{Cy}}\text{Pyr})]$  (**4**) at a glassy carbon electrode in  $\text{CH}_2\text{Cl}_2$  displaying the anodic events observed at higher potentials. Scan rate is 50 mV/s and the supporting electrolyte is 0.1 M  $\text{Bu}_4\text{NPF}_6$ .

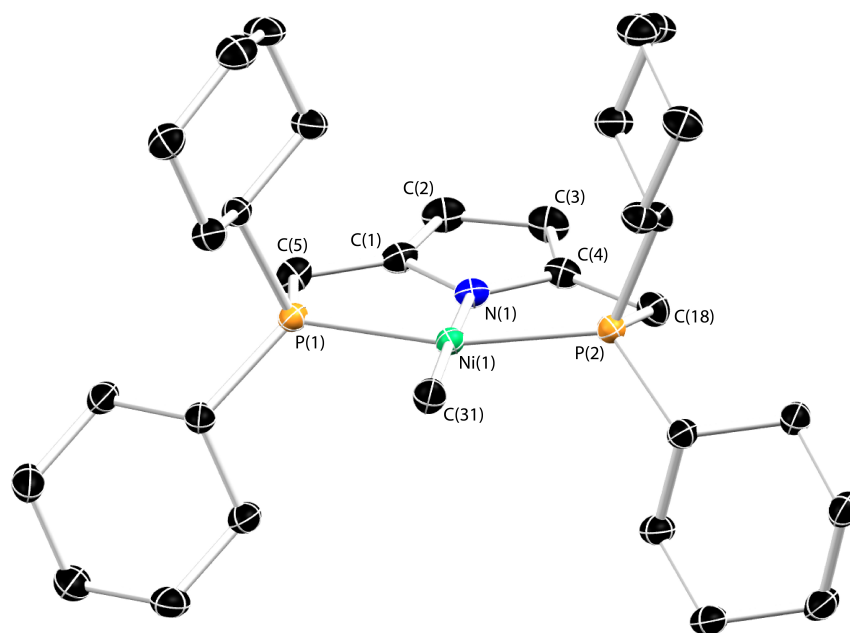

**Figure S6.** Thermal ellipsoid drawing (50%) of  $[\text{Ni}(\text{CH}_3)(\text{P}_2^{\text{Cy}}\text{Pyr})]$  (**6**). Hydrogen atoms omitted for clarity. See Table 1 of the manuscript for selected bond lengths and angles.

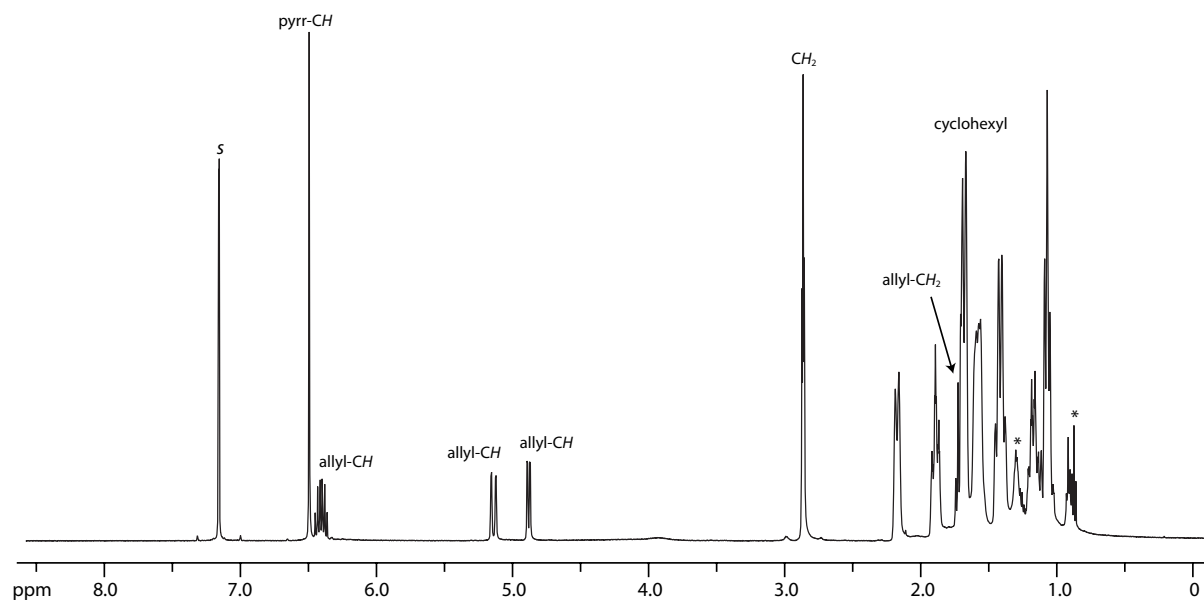

**Figure S7.** 500 MHz  $^1\text{H}$  NMR spectrum of  $[\text{Ni}(\eta^1\text{-C}_3\text{H}_5)(\text{P}_2^{\text{Cy}}\text{Pyr})]$  (**14**) in benzene- $d_6$  showing evidence for  $\eta^1$  coordination of the allyl ligand in solution. Asterisks denote small amount of pentane and THF.

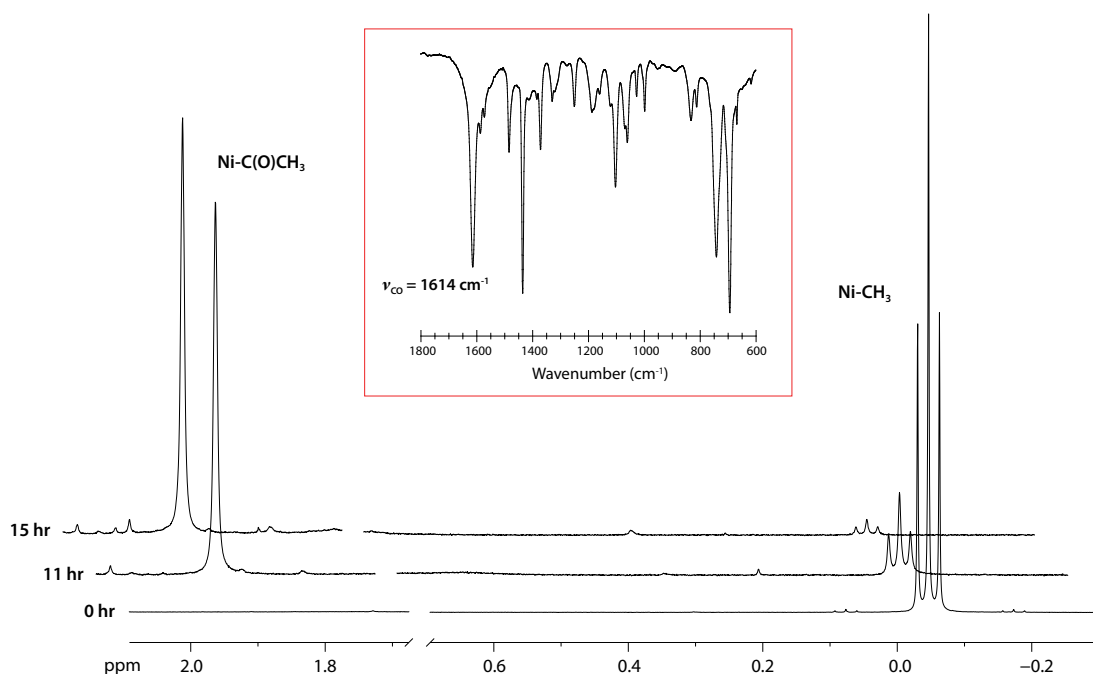

**Figure S8.** 500 MHz  $^1\text{H}$  NMR spectrum of the reaction of  $[\text{Ni}(\text{CH}_3)(\text{P}_2^{\text{Ph}}\text{Pyr})]$  (**5**) with excess  $\text{CO}$  ( $g$ ) in benzene- $d_6$  showing the decrease of the methyl resonance at  $-0.05$  ppm and growth of the acyl resonance at  $1.91$  ppm over 15 hrs at  $50^\circ\text{C}$ . Inset displays the IR spectrum (film, KBr) of the product highlighting the new carbonyl stretch at  $1614\text{ cm}^{-1}$ .

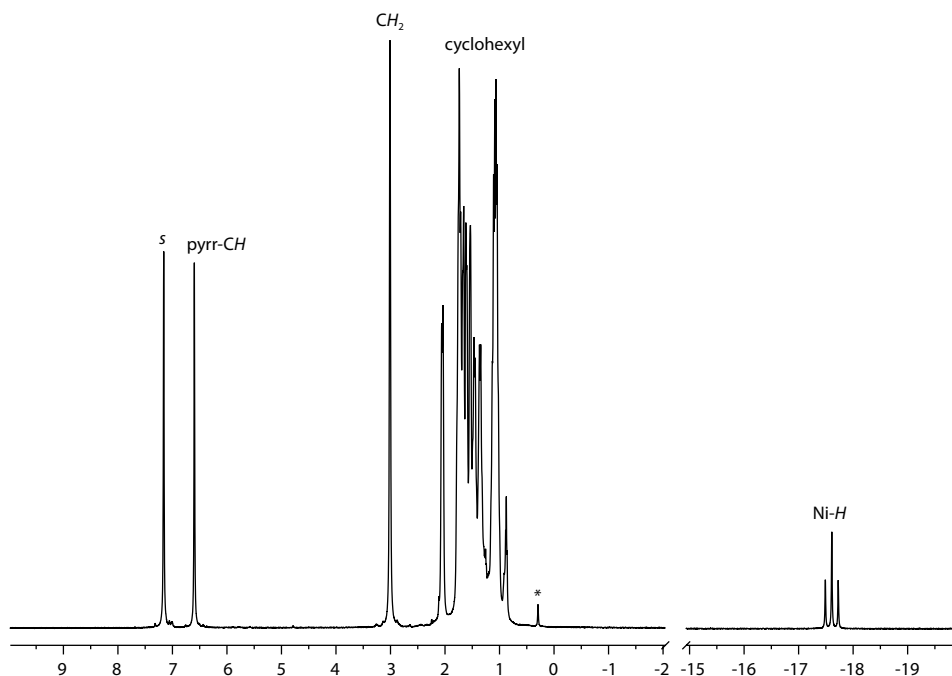

**Figure S9.** 500 MHz  $^1\text{H}$  NMR spectrum of  $[\text{NiH}(\text{P}_2^{\text{Cy}}\text{Pyr})]$  (**15**) in benzene- $d_6$ . Asterisk denotes a small amount of silicone grease.

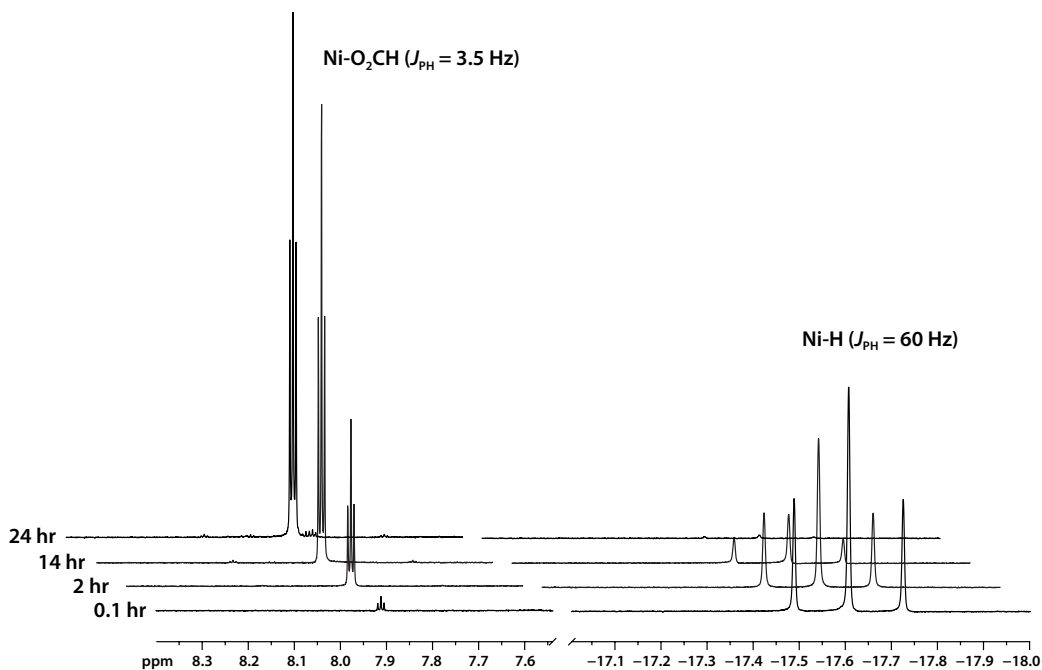

**Figure S10.** 500 MHz  $^1\text{H}$  NMR spectrum of the reaction of  $[\text{NiH}(\text{P}_2^{\text{Cy}}\text{Pyr})]$  (**15**) with excess  $\text{CO}_2$  ( $g$ ) in benzene- $d_6$  showing the decrease of the hydride resonance at  $-17.6$  ppm and growth of the formate resonance at  $7.9$  ppm over 24 hrs at  $23$  °C.

**Table S1.** Crystallographic data and refinement parameters for compounds **4**, **6**, and **7**.<sup>‡</sup>

| Compound                                                      | [NiCl(P <sub>2</sub> <sup>Cy</sup> Pyr)]<br><b>4</b>                       | [Ni(CH <sub>3</sub> )(P <sub>2</sub> <sup>Cy</sup> Pyr)]<br><b>6</b>       | [Ni(C <sub>2</sub> H <sub>5</sub> )(P <sub>2</sub> <sup>Ph</sup> Pyr)]<br><b>7</b>                                          |
|---------------------------------------------------------------|----------------------------------------------------------------------------|----------------------------------------------------------------------------|-----------------------------------------------------------------------------------------------------------------------------|
| Empirical formula                                             | C <sub>30</sub> H <sub>50</sub> ClNNiP <sub>2</sub>                        | C <sub>31</sub> H <sub>53</sub> NNiP <sub>2</sub>                          | C <sub>32</sub> H <sub>31</sub> NNiP <sub>2</sub> ·½C <sub>6</sub> H <sub>6</sub>                                           |
| Formula weight (g/mol)                                        | 580.81                                                                     | 560.39                                                                     | 589.17                                                                                                                      |
| Temperature (K)                                               | 98(2)                                                                      | 98(2)                                                                      | 98(2)                                                                                                                       |
| Crystal system,<br>space group                                | Monoclinic,<br><i>P2<sub>1</sub>/c</i>                                     | Monoclinic,<br><i>P2<sub>1</sub>/c</i>                                     | Triclinic,<br><i>P</i> $\bar{1}$                                                                                            |
| Unit cell dimensions<br>(Å, deg)                              | a = 10.220(3)<br>b = 18.392(5)<br>c = 15.764(4)<br><br>$\beta$ = 90.687(5) | a = 10.235(9)<br>b = 18.391(2)<br>c = 15.803(1)<br><br>$\beta$ = 90.638(1) | a = 10.701(1)<br>b = 14.379(2)<br>c = 20.688(3)<br><br>$\alpha$ = 99.531(2)<br>$\beta$ = 90.677(1)<br>$\gamma$ = 109.668(3) |
| Volume (Å <sup>3</sup> )                                      | 2962.9(1)                                                                  | 2975.0(3)                                                                  | 2948.4(7)                                                                                                                   |
| Z                                                             | 4                                                                          | 4                                                                          | 2                                                                                                                           |
| Calculated density (g/cm <sup>3</sup> )                       | 1.302                                                                      | 1.251                                                                      | 1.324                                                                                                                       |
| Absorption coefficient (mm <sup>-1</sup> )                    | 0.873                                                                      | 0.780                                                                      | 0.791                                                                                                                       |
| F(000)                                                        | 1248                                                                       | 1216                                                                       | 1230                                                                                                                        |
| Crystal size (mm)                                             | 0.20 × 0.15 × 0.07                                                         | 0.29 × 0.27 × 0.09                                                         | 0.29 × 0.12 × 0.08                                                                                                          |
| $\Theta$ range                                                | 1.99 to 26.50°                                                             | 2.28 to 27.50°                                                             | 2.00 to 26.00°                                                                                                              |
| Limiting indices                                              | -12 ≤ <i>h</i> ≤ 12,<br>-23 ≤ <i>k</i> ≤ 19,<br>-29 ≤ <i>l</i> ≤ 19        | -8 ≤ <i>h</i> ≤ 13,<br>-23 ≤ <i>k</i> ≤ 15,<br>-20 ≤ <i>l</i> ≤ 19         | -11 ≤ <i>h</i> ≤ 13,<br>-17 ≤ <i>k</i> ≤ 15,<br>-25 ≤ <i>l</i> ≤ 25                                                         |
| Reflections collected / unique                                | 19495 / 6124<br>[R <sub>int</sub> = 0.0492]                                | 12035 / 6804<br>[R <sub>int</sub> = 0.0203]                                | 17086 / 11533<br>[R <sub>int</sub> = 0.0264]                                                                                |
| Completeness to $\Theta$                                      | 99.7%                                                                      | 99.3%                                                                      | 99.4%                                                                                                                       |
| Absorption correction                                         | multi-scan ABSCOR                                                          | multi-scan ABSCOR                                                          | multi-scan ABSCOR                                                                                                           |
| Min. and max transmission                                     | 0.742 and 1.000                                                            | 0.822 and 1.000                                                            | 0.786 and 1.000                                                                                                             |
| Data / restraints / parameters                                | 6124 / 0 / 316                                                             | 6804 / 0 / 316                                                             | 11533 / 0 / 712                                                                                                             |
| Goodness-of-fit on F <sup>2</sup>                             | 1.031                                                                      | 0.996                                                                      | 1.016                                                                                                                       |
| Final R indices<br>[I > 2 $\sigma$ (I)]                       | R <sub>1</sub> = 0.0467,<br>wR <sub>2</sub> = 0.1066                       | R <sub>1</sub> = 0.0357,<br>wR <sub>2</sub> = 0.0946                       | R <sub>1</sub> = 0.0390,<br>wR <sub>2</sub> = 0.0992                                                                        |
| R indices (all data)                                          | R <sub>1</sub> = 0.0525,<br>wR <sub>2</sub> = 0.1108                       | R <sub>1</sub> = 0.0392,<br>wR <sub>2</sub> = 0.0993                       | R <sub>1</sub> = 0.0435,<br>wR <sub>2</sub> = 0.1033                                                                        |
| Largest diff. peak and hole (e <sup>-</sup> Å <sup>-3</sup> ) | 0.678 and -0.566                                                           | 0.605 and -0.569                                                           | 0.783 and -0.304                                                                                                            |

<sup>‡</sup>Refinement method was full-matrix least-squares on F<sup>2</sup>; wavelength = 0.71073 Å. R<sub>1</sub> =  $\sum||F_o| - |F_c|| / \sum|F_o|$ ; wR<sub>2</sub> =  $\{\sum[w(F_o^2 - F_c^2)^2] / \sum[w(F_o^2)^2]\}^{1/2}$ .

**Table S2.** Crystallographic data and refinement parameters for compounds **10**, **11** and **14**.<sup>‡</sup>

| Compound                                                      | [Ni(CH <sub>2</sub> C <sub>6</sub> H <sub>5</sub> )(P <sub>2</sub> <sup>Cy</sup> Pyr)]<br><b>10</b> | [Ni(C <sub>6</sub> H <sub>5</sub> )(P <sub>2</sub> <sup>Ph</sup> Pyr)]<br><b>11</b> | [Ni( $\eta^1$ -C <sub>3</sub> H <sub>5</sub> )(P <sub>2</sub> <sup>Cy</sup> Pyr)]<br><b>14</b> |
|---------------------------------------------------------------|-----------------------------------------------------------------------------------------------------|-------------------------------------------------------------------------------------|------------------------------------------------------------------------------------------------|
| Empirical formula                                             | C <sub>37</sub> H <sub>57</sub> NNiP <sub>2</sub>                                                   | C <sub>36</sub> H <sub>31</sub> NNiP <sub>2</sub>                                   | C <sub>33</sub> H <sub>55</sub> NNiP <sub>2</sub>                                              |
| Formula weight (g/mol)                                        | 636.49                                                                                              | 598.27                                                                              | 586.44                                                                                         |
| Temperature (K)                                               | 98(2)                                                                                               | 98(2)                                                                               | 98(2)                                                                                          |
| Crystal system,<br>space group                                | Orthorhombic<br><i>Pna</i> 2 <sub>1</sub>                                                           | Monoclinic,<br><i>P</i> 2 <sub>1</sub> / <i>c</i>                                   | Monoclinic,<br><i>P</i> 2 <sub>1</sub> / <i>c</i>                                              |
| Unit cell dimensions<br>(Å, deg)                              | a = 11.562(1)<br>b = 17.618(1)<br>c = 16.686(1)                                                     | a = 10.0884(8)<br>b = 15.279(1)<br>c = 19.309(2)<br><br>$\beta$ = 102.637(1)        | a = 16.695(3)<br>b = 15.595(3)<br>c = 12.176(2)<br><br>$\beta$ = 93.919(3)                     |
| Volume (Å <sup>3</sup> )                                      | 3399.1(5)                                                                                           | 2904.3(4)                                                                           | 3163(1)                                                                                        |
| Z                                                             | 4                                                                                                   | 4                                                                                   | 4                                                                                              |
| Calculated density (g/cm <sup>3</sup> )                       | 1.244                                                                                               | 1.368                                                                               | 1.221                                                                                          |
| Absorption coefficient (mm <sup>-1</sup> )                    | 0.691                                                                                               | 0.805                                                                               | 0.736                                                                                          |
| F(000)                                                        | 1376                                                                                                | 1248                                                                                | 1252                                                                                           |
| Crystal size (mm)                                             | 0.30 × 0.15 × 0.10                                                                                  | 0.30 × 0.25 × 0.20                                                                  | 0.27 × 0.20 × 0.05                                                                             |
| $\Theta$ range                                                | 2.31 to 27.50°                                                                                      | 2.65 to 26.50°                                                                      | 2.61 to 27.50°                                                                                 |
| Limiting indices                                              | -12 ≤ <i>h</i> ≤ 15,<br>-22 ≤ <i>k</i> ≤ 22,<br>-21 ≤ <i>l</i> ≤ 21                                 | -12 ≤ <i>h</i> ≤ 12,<br>-17 ≤ <i>k</i> ≤ 19,<br>-23 ≤ <i>l</i> ≤ 24                 | -21 ≤ <i>h</i> ≤ 21,<br>-20 ≤ <i>k</i> ≤ 20,<br>-15 ≤ <i>l</i> ≤ 15                            |
| Reflections collected / unique                                | 22437 / 7696<br>[R <sub>int</sub> = 0.0295]                                                         | 20467 / 5979<br>[R <sub>int</sub> = 0.0203]                                         | 26998 / 7244<br>[R <sub>int</sub> = 0.0373]                                                    |
| Completeness to $\Theta$                                      | 99.4%                                                                                               | 99.2%                                                                               | 99.7%                                                                                          |
| Absorption correction                                         | multi-scan ABSCOR                                                                                   | multi-scan ABSCOR                                                                   | multi-scan ABSCOR                                                                              |
| Min. and max transmission                                     | 0.839 and 1.000                                                                                     | 0.879 and 1.000                                                                     | 0.811 and 1.000                                                                                |
| Data / restraints / parameters                                | 7696 / 1 / 370                                                                                      | 5979 / 0 / 361                                                                      | 7244 / 0 / 352                                                                                 |
| Goodness-of-fit on F <sup>2</sup>                             | 0.990                                                                                               | 1.013                                                                               | 1.016                                                                                          |
| Final R indices<br>[I > 2 $\sigma$ (I)]                       | R <sub>1</sub> = 0.0267,<br>wR <sub>2</sub> = 0.0626                                                | R <sub>1</sub> = 0.0282,<br>wR <sub>2</sub> = 0.0756                                | R <sub>1</sub> = 0.0338,<br>wR <sub>2</sub> = 0.0835                                           |
| R indices (all data)                                          | R <sub>1</sub> = 0.0273,<br>wR <sub>2</sub> = 0.0630                                                | R <sub>1</sub> = 0.0296,<br>wR <sub>2</sub> = 0.0772                                | R <sub>1</sub> = 0.0357,<br>wR <sub>2</sub> = 0.0855                                           |
| Largest diff. peak and hole (e <sup>-</sup> Å <sup>-3</sup> ) | 0.283 and -0.213                                                                                    | 0.343 and -0.261                                                                    | 0.745 and -0.261                                                                               |

<sup>‡</sup>Refinement method was full-matrix least-squares on F<sup>2</sup>; wavelength = 0.71073 Å. R<sub>1</sub> =  $\sum||F_o| - |F_c|| / \sum|F_o|$ ; wR<sub>2</sub> =  $\{\sum[w(F_o^2 - F_c^2)^2] / \sum[w(F_o^2)^2]\}^{1/2}$ .
